# Supplementary figures and images for: Comparison between the Effects of Acupuncture Relative to Other Controls on Irritable Bowel Syndrome: A Meta-Analysis
Source: Hindawi journal article supplement (doi:10.1155/2019/2871505), 2019-11-11

**a**

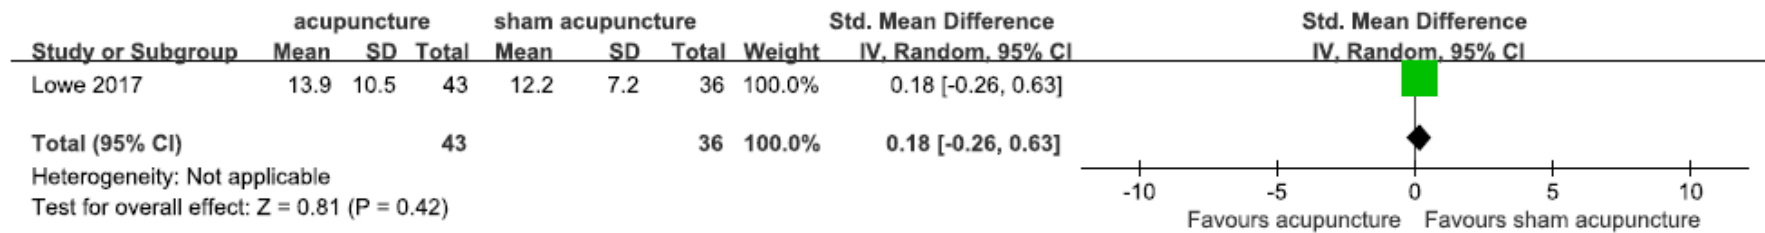

**b**

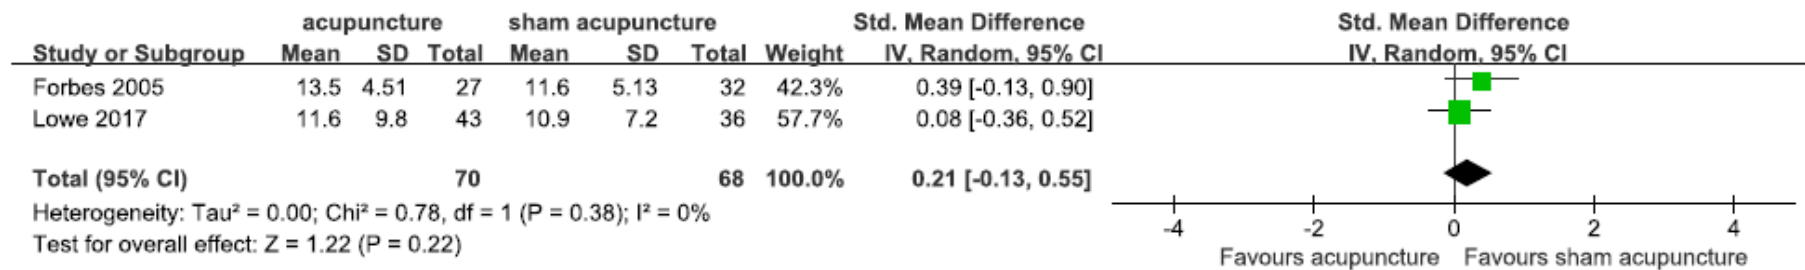

Supplement: f1 [file 2871505.f1.zip]

**a**

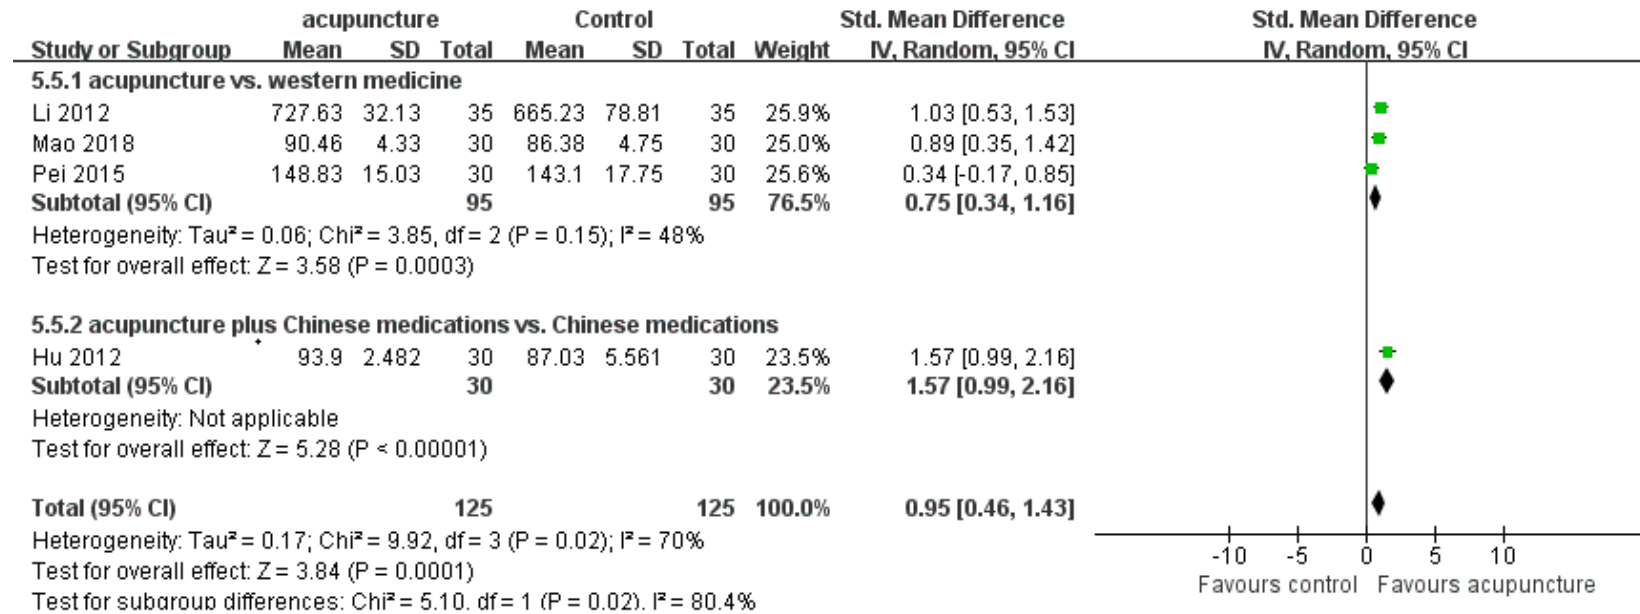

**b**

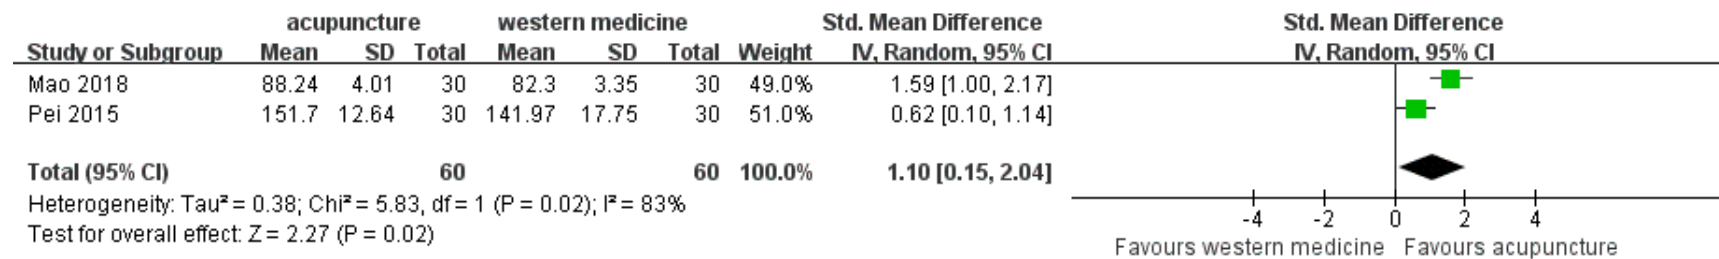

Supplement: f1 [file 2871505.f1.zip]

**a**

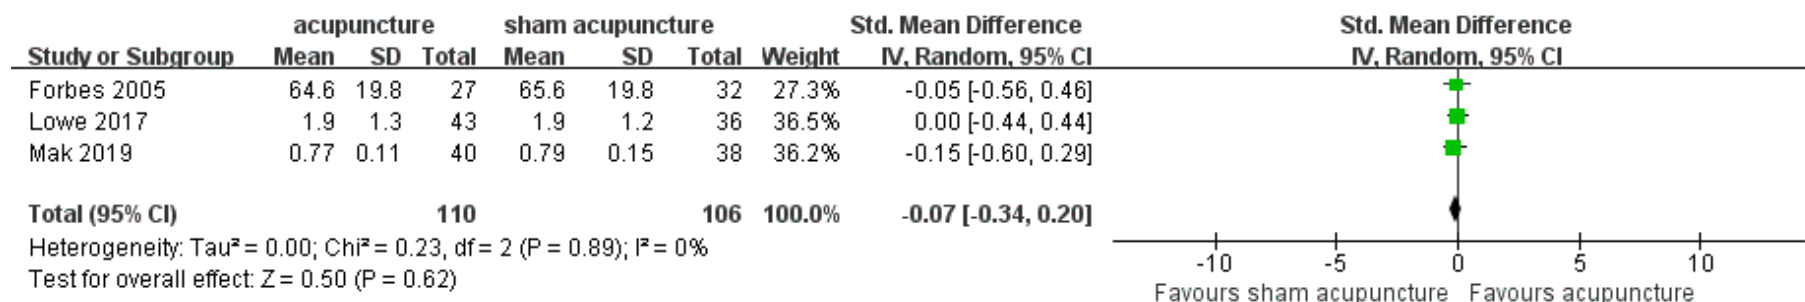

**b**

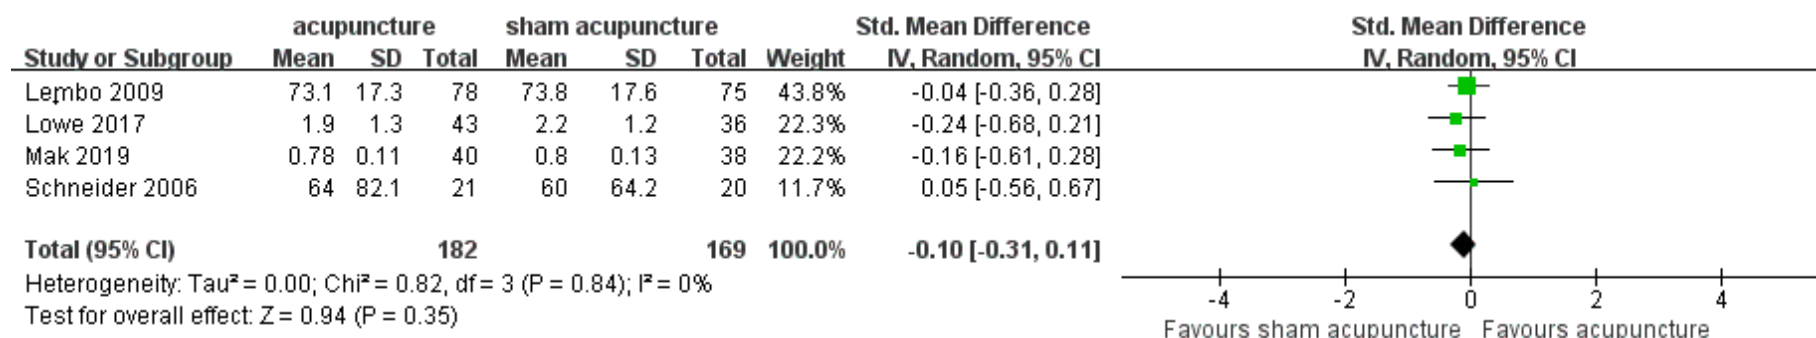

Supplement: f1 [file 2871505.f1.zip]
